# Supplementary material
Source: publisher site journal article supplement (https://www.dovepress.com/article/383526)
Supplement: Supplementary file 1 [file get_supplementary_file.php]

**Appendix Table 1** Scores on Assessment of Cognitive Function, Depression, and Quality of Life (Analyses for Intention-To-Treat Using the Last Observation Carried Forward Method)

| Outcome                                                   | CTI Group<br>(n=44) |                  | Wait-list group<br>(n=42) |                  |
|-----------------------------------------------------------|---------------------|------------------|---------------------------|------------------|
|                                                           | Mean                | (95% CI)         | Mean                      | (95% CI)         |
| <b>Global cognitive function</b>                          |                     |                  |                           |                  |
| TMSE at T0                                                | 28.84               | (28.42, 29.26)   | 28.83                     | (28.50, 29.16)   |
| TMSE at T1                                                | 29.30               | (28.99, 29.60)   | 28.71                     | (28.34, 29.09)   |
| TMSE at T2                                                | 29.00               | (28.59, 29.41)   | 28.67                     | (28.26, 29.08)   |
| <b>Cognitive function in each domain</b>                  |                     |                  |                           |                  |
| <i>Attention-concentration</i>                            |                     |                  |                           |                  |
| DSF at T0                                                 | 8.48                | (7.78, 9.18)     | 8.40                      | (7.74, 9.07)     |
| DSF at T1                                                 | 9.05                | (8.33, 9.76)     | 8.29                      | (7.61, 8.96)     |
| DSF at T2                                                 | 9.36                | (8.67, 10.06)    | 8.98                      | (8.36, 9.59)     |
| <i>Working memory</i>                                     |                     |                  |                           |                  |
| DSB at T0                                                 | 6.05                | (5.34, 6.75)     | 5.17                      | (4.57, 5.76)     |
| DSB at T1                                                 | 6.18                | (5.49, 6.87)     | 5.29                      | (4.74, 5.83)     |
| DSB at T2                                                 | 6.66                | (5.82, 7.50)     | 5.29                      | (4.58, 5.99)     |
| <i>Verbal memory</i>                                      |                     |                  |                           |                  |
| WLLT at T0                                                | 7.73                | (7.38, 8.07)     | 7.43                      | (7.09, 7.76)     |
| WLLT at T1                                                | 7.80                | (7.43, 8.16)     | 7.56                      | (7.23, 7.90)     |
| WLLT at T2                                                | 8.02                | (7.61, 8.42)     | 7.91                      | (7.56, 8.26)     |
| <i>Psychomotor speed<sup>‡</sup></i>                      |                     |                  |                           |                  |
| TMT-A time at T0                                          | 47.64               | (42.63, 52.64)   | 49.21                     | (44.0, 54.43)    |
| TMT-A time at T1                                          | 45.95               | (41.84, 50.06)   | 49.00                     | (42.87, 55.13)   |
| TMT-A time at T2                                          | 42.32               | (37.56, 47.08)   | 44.36                     | (37.92, 50.80)   |
| <i>Executive function<sup>‡</sup></i>                     |                     |                  |                           |                  |
| TMT-B time at T0                                          | 134.27              | (112.54, 156.01) | 124.60                    | (110.27, 138.92) |
| TMT-B time at T1                                          | 121.48              | (104.63, 138.32) | 127.69                    | (109.40, 145.98) |
| TMT-B time at T2                                          | 108.48              | (93.61, 123.34)  | 110.86                    | (94.60, 127.12)  |
| <i>Visuoconstructional-perceptual ability<sup>‡</sup></i> |                     |                  |                           |                  |
| Constructional praxis at T0                               | 0.30                | (0.14, 0.45)     | 0.38                      | (0.23, 0.53)     |
| Constructional praxis at T1                               | 0.27                | (0.14, 0.41)     | 0.31                      | (0.16, 0.46)     |
| Constructional praxis at T2                               | 0.25                | (0.12, 0.38)     | 0.36                      | (0.19, 0.52)     |

|                              |       |                |       |                |
|------------------------------|-------|----------------|-------|----------------|
| <i>Delayed recall memory</i> |       |                |       |                |
| Word Recall at T0            | 7.59  | (7.08, 8.10)   | 7.43  | (6.82, 8.03)   |
| Word Recall at T1            | 7.77  | (7.26, 8.28)   | 7.29  | (6.68, 7.89)   |
| Word Recall at T2            | 8.11  | (7.52, 8.71)   | 7.52  | (6.78, 8.27)   |
| <i>Language fluency</i>      |       |                |       |                |
| Letter "S" at T0             | 9.66  | (8.31, 11.0)   | 9.98  | (8.58, 11.38)  |
| Letter "S" at T1             | 10.11 | (8.77, 11.45)  | 9.93  | (8.61, 11.25)  |
| Letter "S" at T2             | 10.27 | (8.87, 11.67)  | 9.81  | (8.31, 11.31)  |
| Category fluency at T0       | 13.16 | (11.99, 14.33) | 12.40 | (11.36, 13.45) |
| Category fluency at T1       | 12.86 | (11.96, 13.77) | 12.48 | (11.35, 13.60) |
| Category fluency at T2       | 13.48 | (12.41, 14.54) | 13.02 | (11.89, 14.16) |
| <b>Quality of Life</b>       |       |                |       |                |
| TGDS-15 <sup>‡</sup> at T0   | 2.32  | (1.82, 2.81)   | 2.26  | (1.63, 2.90)   |
| TGDS-15 <sup>‡</sup> at T1   | 1.70  | (1.33, 2.08)   | 1.71  | (1.21, 2.22)   |
| TGDS-15 <sup>‡</sup> at T2   | 1.64  | (1.23, 2.05)   | 1.50  | (0.97, 2.03)   |
| OPQOL-brief-Th at T0         | 20.93 | (19.54, 22.32) | 21.93 | (20.45, 23.41) |
| OPQOL-brief-Th at T1         | 21.00 | (19.44, 22.56) | 21.31 | (19.82, 22.80) |
| OPQOL-brief-Th at T2         | 22.95 | (21.58, 24.33) | 22.81 | (21.45, 24.17) |

**Notes:** ‡ These neuropsychological tests have reversal scoring which means the lower the score the better the performance.

**Abbreviations:** CTI, Cognitive training intervention; TMSE, Thai Mental Status Examination; TGDS-15, Thai Geriatric Depression Scale-15; OPQOL-brief-Th, Thai version of Older People's Quality of Life-brief; DSF, Digit span forward; DSB, Digit span backward; WLLT, Word list learning test; TMT-A, Trail making A test; TMT-B, Trail making B test

**Appendix Table 2a** Scores on Assessment of Cognitive Function, Depression, and Quality of Life  
(Analyses for Per Protocol Analysis)

| Outcome                                                   | CTI Group (n=37) |                  | Wait-list group (n=30) |                  |
|-----------------------------------------------------------|------------------|------------------|------------------------|------------------|
|                                                           | Mean             | (95% CI)         | Mean                   | (95% CI)         |
| <b>Global cognitive function</b>                          |                  |                  |                        |                  |
| TMSE at T0                                                | 28.80            | (28.31, 29.29)   | 28.70                  | (28.31, 29.09)   |
| TMSE at T1                                                | 29.29            | (28.95, 29.62)   | 28.57                  | (28.09, 29.04)   |
| TMSE at T2                                                | 28.91            | (28.43, 29.40)   | 28.50                  | (27.96, 29.04)   |
| <b>Cognitive function in each domain</b>                  |                  |                  |                        |                  |
| <i>Attention-concentration</i>                            |                  |                  |                        |                  |
| DSF at T0                                                 | 8.49             | (7.74, 9.23)     | 8.23                   | (7.41, 9.06)     |
| DSF at T1                                                 | 8.97             | (8.20, 9.74)     | 7.90                   | (7.08, 8.72)     |
| DSF at T2                                                 | 9.31             | (8.51, 10.09)    | 8.77                   | (7.98, 9.55)     |
| <i>Working memory</i>                                     |                  |                  |                        |                  |
| DSB at T0                                                 | 6.00             | (5.21, 6.79)     | 5.20                   | (4.44, 5.96)     |
| DSB at T1                                                 | 6.51             | (5.70, 7.33)     | 5.27                   | (4.59, 5.94)     |
| DSB at T2                                                 | 6.89             | (5.92, 7.85)     | 5.37                   | (4.46, 6.27)     |
| <i>Verbal memory</i>                                      |                  |                  |                        |                  |
| WLLT at T0                                                | 7.71             | (7.31, 8.12)     | 7.37                   | (6.98, 7.75)     |
| WLLT at T1                                                | 7.76             | (7.34, 8.18)     | 7.56                   | (7.16, 7.95)     |
| WLLT at T2                                                | 8.02             | (7.52, 8.51)     | 8.13                   | (7.75, 8.52)     |
| <i>Psychomotor speed<sup>‡</sup></i>                      |                  |                  |                        |                  |
| TMT-A time at T0                                          | 47.38            | (41.69, 53.08)   | 49.77                  | (43.21, 56.33)   |
| TMT-A time at T1                                          | 46.29            | (41.30, 50.29)   | 49.27                  | (41.21, 57.32)   |
| TMT-A time at T2                                          | 42.53            | (36.77, 48.29)   | 44.10                  | (35.69, 52.51)   |
| <i>Executive function<sup>‡</sup></i>                     |                  |                  |                        |                  |
| TMT-B time at T0                                          | 134.35           | (107.67, 161.04) | 120.97                 | (104.36, 137.57) |
| TMT-B time at T1                                          | 116.50           | (97.15, 135.85)  | 128.33                 | (105.78, 150.88) |
| TMT-B time at T2                                          | 102.94           | (86.20, 119.68)  | 107.80                 | (89.38, 126.22)  |
| <i>Visuoconstructional-perceptual ability<sup>‡</sup></i> |                  |                  |                        |                  |
| Constructional praxis at T0                               | 0.24             | (0.06, 0.42)     | 0.43                   | (0.25, 0.62)     |
| Constructional praxis at T1                               | 0.24             | (0.09, 0.40)     | 0.33                   | (0.15, 0.51)     |
| Constructional praxis at T2                               | 0.21             | (0.06, 0.36)     | 0.33                   | (0.13, 0.54)     |
| <i>Delayed recall memory</i>                              |                  |                  |                        |                  |

|                            |       |                |       |                |
|----------------------------|-------|----------------|-------|----------------|
| Word Recall at T0          | 7.63  | (7.06, 8.19)   | 7.43  | (6.74, 8.13)   |
| Word Recall at T1          | 7.83  | (7.26, 8.00)   | 7.30  | (6.64, 7.96)   |
| Word Recall at T2          | 8.09  | (7.37, 8.80)   | 7.70  | (6.81, 8.59)   |
| <i>Language fluency</i>    |       |                |       |                |
| Letter "S" at T0           | 9.41  | (7.80, 11.02)  | 10.27 | (8.60, 11.93)  |
| Letter "S" at T1           | 10.06 | (8.52, 11.06)  | 10.37 | (8.75, 11.98)  |
| Letter "S" at T2           | 10.12 | (8.53, 11.70)  | 9.87  | (8.01, 11.72)  |
| Category fluency at T0     | 13.12 | (11.70, 14.53) | 12.73 | (11.44, 14.03) |
| Category fluency at T1     | 13.03 | (11.89, 14.17) | 12.80 | (11.37, 14.23) |
| Category fluency at T2     | 13.85 | (12.56, 15.25) | 13.33 | (11.86, 14.81) |
| <b>Quality of Life</b>     |       |                |       |                |
| TGDS-15 <sup>‡</sup> at T0 | 2.43  | (1.84, 3.02)   | 2.53  | (1.82, 3.25)   |
| TGDS-15 <sup>‡</sup> at T1 | 1.66  | (1.23, 2.08)   | 1.80  | (1.30, 2.30)   |
| TGDS-15 <sup>‡</sup> at T2 | 1.63  | (1.18, 2.08)   | 1.40  | (0.90, 1.90)   |
| OPQOL-brief-Th at T0       | 20.60 | (18.93, 22.27) | 22.10 | (20.46, 23.74) |
| OPQOL-brief-Th at T1       | 21.03 | (19.18, 22.86) | 21.30 | (19.62, 22.98) |
| OPQOL-brief-Th at T2       | 22.83 | (21.19, 24.46) | 22.77 | (21.25, 24.29) |

**Notes:** ‡ These neuropsychological tests have reversal scoring which means the lower the score the better the performance.

**Abbreviations:** CTI, Cognitive training intervention; TMSE, Thai Mental Status Examination; TGDS-15, Thai Geriatric Depression Scale-15; OPQOL-brief-Th, Thai version of Older People's Quality of Life-brief; DSF, Digit span forward; DSB, Digit span backward; WLLT, Word list learning test; TMT-A, Trail making A test; TMT-B, Trail making B test

**Appendix Table 2b** Treatment Effect and Carryover Effect (Analyses for Per Protocol Analysis)

| Outcome                                   | CTI Group<br>(n=37) |                 | Wait-list group<br>(n=30) |                 | Mean<br>Difference | (95% CI)        |
|-------------------------------------------|---------------------|-----------------|---------------------------|-----------------|--------------------|-----------------|
|                                           | Mean                | (95% CI)        | Mean                      | (95% CI)        |                    |                 |
| <b>Global cognitive function</b>          |                     |                 |                           |                 |                    |                 |
| Δ TMSE at T1-T0                           | 0.49                | (0.02, 0.96)    | -0.13                     | (-0.58, 0.31)   | 0.62               | (-0.03, 1.26)   |
| Δ TMSE at T2-T0                           | 0.11                | (-0.32, 0.54)   | -0.20                     | (-0.72, 0.32)   | 0.34               | (-0.34, 1.02)   |
| <b>Cognitive functions in each domain</b> |                     |                 |                           |                 |                    |                 |
| <i>Attention-concentration</i>            |                     |                 |                           |                 |                    |                 |
| Δ DSF at T1-T0                            | 0.57                | (-0.07, 1.17)   | -0.33                     | (-1.28, 0.61)   | 0.90               | (-0.19, 2.00)   |
| Δ DSF at T2-T0                            | 0.83                | (0.08, 1.58)    | 0.53                      | (-0.20, 1.27)   | 0.30               | (-0.74, 1.33)   |
| <i>Working memory</i>                     |                     |                 |                           |                 |                    |                 |
| Δ DSB at T1-T0                            | 0.46                | (-0.45, 0.82)   | 0.07                      | (-0.61, 0.74)   | 0.39               | (-0.44, 1.23)   |
| Δ DSB at T2-T0                            | 0.89                | (0.19, 1.58)    | 0.17                      | (-0.86, 1.19)   | 0.72               | (-0.46, 1.19)   |
| <i>Verbal memory</i>                      |                     |                 |                           |                 |                    |                 |
| Δ WLLT at T1-T0                           | 0.01                | (-0.23, 0.46)   | 0.19                      | (-0.25, 0.63)   | -0.18              | (-0.70, 0.34)   |
| Δ WLLT at T2-T0                           | 0.30                | (-0.08, 0.69)   | 0.77                      | (0.31, 1.22)    | -0.46              | (-1.04, 0.12)   |
| <i>Psychomotor speed<sup>‡</sup></i>      |                     |                 |                           |                 |                    |                 |
| Δ TMT-A time at T1-T0                     | -1.51               | (-6.77, 4.72)   | -0.50                     | (-5.94, 4.94)   | -1.01              | (-9.22, 7.19)   |
| Δ TMT-A time at T2-T0                     | -4.85               | (-11.36, 1.65)  | -5.67                     | (-11.96, 0.63)  | 0.86               | (-8.12, 9.74)   |
| <i>Executive function<sup>‡</sup></i>     |                     |                 |                           |                 |                    |                 |
| Δ TMT-B time at T1-T0                     | -14.84              | (-38.85, 11.22) | 7.37                      | (-10.80, 25.54) | -22.20             | (-54.68, 10.27) |
| Δ TMT-B time at T2-T0                     | -31.41              | (-54.28, -8.55) | -13.16                    | (-27.63, -1.30) | -18.24             | (-45.61, 9.12)  |

|                                                            |       |                |       |                |       |               |
|------------------------------------------------------------|-------|----------------|-------|----------------|-------|---------------|
| <i>Visuoconstructional-perceptual ability</i> <sup>‡</sup> |       |                |       |                |       |               |
| Δ Constructional praxis at T1-T0                           | 0.0   | (-0.19, 0.14)  | -0.10 | (-0.28, 0.08)  | 0.10  | (-0.13, 0.33) |
| Δ Constructional praxis at T2-T0                           | -0.03 | (-0.19, 0.13)  | -0.10 | (-0.32, 0.13)  | 0.07  | (-0.20, 0.34) |
| <i>Delayed recall memory</i>                               |       |                |       |                |       |               |
| Δ Word recall at T1-T0                                     | 0.19  | (-0.22, 0.60)  | -0.13 | (-0.68, 0.42)  | 0.32  | (-0.34, 0.98) |
| Δ Word recall at T2-T0                                     | 0.46  | (-0.02, 0.93)  | 0.26  | (-0.64, 1.18)  | 0.19  | (-0.77, 1.15) |
| <i>Language fluency</i>                                    |       |                |       |                |       |               |
| Δ Letter “S” at T1-T0                                      | 0.43  | (-0.81, 1.67)  | 0.10  | (-1.42, 1.62)  | 0.33  | (-1.57, 2.24) |
| Δ Letter “S” at T2-T0                                      | 0.63  | (-0.84, 2.10)  | -0.40 | (-1.97, 1.17)  | 1.02  | (-1.09, 3.14) |
| Δ Category fluency at T1-T0                                | -0.22 | (-1.37, 0.94)  | 0.07  | (-1.23, 1.37)  | -0.28 | (-1.99, 1.42) |
| Δ Category fluency at T2-T0                                | 0.74  | (-0.24, 1.71)  | 0.60  | (-0.56, 1.76)  | -0.14 | (-1.34, 1.61) |
| <b>Quality of Life</b>                                     |       |                |       |                |       |               |
| Δ TGDS-15 <sup>‡</sup> at T1-T0                            | -0.73 | (-1.20, -0.26) | -0.73 | (-1.52, 0.05)  | 0.0   | (-0.86, 0.86) |
| Δ TGDS-15 <sup>‡</sup> at T2-T0                            | -0.80 | (-1.28, -0.32) | -1.13 | (-1.77, -0.50) | 0.33  | (-0.44, 1.10) |
| Δ OPQOL-brief at T1-T0                                     | 0.38  | (-1.16, 1.92)  | -0.80 | (-2.98, 1.38)  | 1.12  | (-1.37, 3.72) |
| Δ OPQOL-brief at T2-T0                                     | 2.23  | (0.71, 3.75)   | 0.67  | (-1.61, 2.95)  | 1.56  | (-1.06, 4.18) |

**Notes:** ‡ These neuropsychological tests have reversal scoring which means the lower the score the better the performance.

**Abbreviations:** CTI, Cognitive training intervention; TMSE, Thai Mental Status Examination; TGDS-15, Thai Geriatric Depression Scale-15; OPQOL-brief-Th, Thai version of Older People’s Quality of Life-brief; DSF, Digit span forward; DSB, Digit span backward; WLLT, Word list learning test; TMT-A, Trail making A test; TMT-B, Trail making B test; T0, at baseline; T1, at 12<sup>th</sup> week; T2, at 24<sup>th</sup> week, \**P*-value < 0.0
